## Corrigendum

# The ATP-dependent chromatin remodeler Chd1 is recruited by transcription elongation factors and maintains H3K4me3/H3K36me3 domains at actively transcribed and spliced genes

Yaelim Lee<sup>1</sup>, Daechan Park<sup>2</sup> and Vishwanath R. Iyer<sup>1,\*</sup>

<sup>1</sup>Center for Systems and Synthetic Biology, Institute for Cellular and Molecular Biology, Department of Molecular Biosciences, University of Texas at Austin, Austin, TX 78712, USA and <sup>2</sup>Center for Theragnosis, Biomedical Research Institute, Korea Institute of Science and Technology (KIST), Seoul 02792, Republic of Korea

*Nucleic Acids Res* (2017) 45 (12): 7180–7190. doi:10.1093/nar/gkx321

The Authors would like to correct a missing funding source in their paper. The complete funding statement should be the following:

Funded in part by National Institutes of Health [CA095548 and CA198648] and Cancer Prevention and Research Institute of Texas [RP120194] to V.R.I. and KIST Intramural Research grant [2E26910] to D.P.

This has now been corrected online.

---

\*To whom correspondence should be addressed. Tel: +1 512 232 7833; Fax: +1 512 232 3472; Email: vishy.iyer@gmail.com
